# Supplementary material
Source: PubMed Central journal article supplement (PMC6986426)
Supplement: NIHMS1545813-supplement-8.pdf [file NIHMS1545813-supplement-8.pdf]

**Table S1. Cryo-EM data collection, refinement, and validation statistics. Related to the STAR Methods**

|                                                  | rNa <sub>v</sub> 1.5 <sub>C</sub><br>(EMDB code: EMD-20951)<br>(PDB code: 6UZ3) | rNa <sub>v</sub> 1.5 <sub>C</sub> -flecainide<br>(EMDB code: EMD-20949)<br>(PDB code: 6UZ0) |
|--------------------------------------------------|---------------------------------------------------------------------------------|---------------------------------------------------------------------------------------------|
| <b>Data collection and processing</b>            |                                                                                 |                                                                                             |
| Magnification                                    | 130,000                                                                         | 130,000                                                                                     |
| Voltage (kV)                                     | 300                                                                             | 300                                                                                         |
| Electron exposure (e-/Å <sup>2</sup> )           | 60                                                                              | 60                                                                                          |
| Defocus range (µm)                               | 1.0 – 2.5                                                                       | 1.0 – 3.0                                                                                   |
| Pixel size (Å)                                   | 1.056                                                                           | 1.056                                                                                       |
| Symmetry imposed                                 | C1                                                                              | C1                                                                                          |
| Initial particle images (no.)                    | 2,188,972                                                                       | 2,369,854                                                                                   |
| Final particle images (no.)                      | 106,104                                                                         | 513,604                                                                                     |
| Map resolution (Å)                               | 3.50                                                                            | 3.24                                                                                        |
| FSC threshold                                    | 0.143                                                                           | 0.143                                                                                       |
| Map resolution range (Å)                         | 3.3 – 6.0                                                                       | 3.0-5.0                                                                                     |
| <b>Refinement</b>                                |                                                                                 |                                                                                             |
| Initial model used (EMDB code)                   |                                                                                 |                                                                                             |
| Model resolution (Å)                             | 3.85                                                                            | 3.50                                                                                        |
| FSC threshold                                    | 0.5                                                                             | 0.5                                                                                         |
| Model resolution range (Å)                       | 3.3 – 6.0                                                                       | 3.0-5.0                                                                                     |
| Map sharpening <i>B</i> factor (Å <sup>2</sup> ) | -60                                                                             | -60                                                                                         |
| Model composition                                |                                                                                 |                                                                                             |
| Non-hydrogen atoms                               | 9463                                                                            | 9565                                                                                        |
| Protein residues                                 | 1125                                                                            | 1138                                                                                        |
| Ligand                                           | 21                                                                              | 26                                                                                          |
| <i>B</i> factors (Å <sup>2</sup> )               |                                                                                 |                                                                                             |
| Protein                                          | 105.6                                                                           | 56.5                                                                                        |
| Ligand                                           | 89.3                                                                            | 61.0                                                                                        |
| R.m.s. deviations                                |                                                                                 |                                                                                             |
| Bonds (Å)                                        | 0.008                                                                           | 0.006                                                                                       |
| Angles (°)                                       | 0.914                                                                           | 0.799                                                                                       |
| Validations                                      |                                                                                 |                                                                                             |
| MolProbity score                                 | 2.46                                                                            | 2.20                                                                                        |
| Poor rotamers (%)                                | 0.32                                                                            | 0.10                                                                                        |
| Ramachandran plot                                |                                                                                 |                                                                                             |
| Favored (%)                                      | 88.30                                                                           | 90.94                                                                                       |
| Allowed (%)                                      | 11.43                                                                           | 8.79                                                                                        |
| Disallowed (%)                                   | 0.27                                                                            | 0.27                                                                                        |
